# Supplementary material for: Massive Parallel DNA Sequencing of Patients with Inherited Cardiomyopathies in Cyprus and Suggestion of Digenic or Oligogenic Inheritance
Source: MDPI journal article supplement (doi:10.3390/genes15030319), 2024-02-28
Supplement: s1 [file s1]

## Supplemental Materials

**Table S1.** The 72 genes in our NGS panel and their associated general and clinical features

| Gene           | Protein                                       | Role of protein in cardiomyocytes                                                                                            | Inheritance | HC M | DC M | RCM | ARVC | LVNC |
|----------------|-----------------------------------------------|------------------------------------------------------------------------------------------------------------------------------|-------------|------|------|-----|------|------|
| <i>ABCC9</i>   | Sulfonylurea receptor 2 (SUR2)                | Involving in the formation of potassium channels                                                                             | AD          |      | X    |     |      |      |
| <i>ACTA1</i>   | Actin alpha 1, skeletal muscle                | The core of the thin filament of the sarcomere in adult skeletal muscle                                                      | AD, AR      | X    |      |     |      |      |
| <i>ACTC1</i>   | Actin alpha 1, cardiac muscle                 | The core of the thin filament of the sarcomere in adult cardiac muscle                                                       | AD          | X    | X    | X   |      | X    |
| <i>ACTN2</i>   | Actinin alpha 2                               | Structural and functional role in the sarcomeres                                                                             | AD          | X    | X    |     |      |      |
| <i>ALPK3</i>   | Alpha protein kinase 3                        | Transcriptional regulator which phosphorylates cardiac transcriptional factors; involving in cardiac muscle cell development | AR          | X    |      |     |      |      |
| <i>ANK2</i>    | Ankyrin B                                     | Interacting with ion channels, ion transporters and signalling molecules across the cell membranes                           | AD          |      |      |     |      |      |
| <i>ANKRD1</i>  | Ankyrin repeat protein                        | Z-disc component                                                                                                             | N/A         | X    | X    |     |      |      |
| <i>BAG3</i>    | BCL2 associated athanogene 3                  | Co-chaperone with members of the heat-shock protein family; inhibiting apoptosis; Z-disc structural role                     | AD          | X    | X    | X   |      |      |
| <i>CACNA1C</i> | Calcium voltage-gated channel subunit alpha 1 | Involving in the formation of calcium channels                                                                               | AD          |      |      |     |      |      |
| <i>CACNB2</i>  | Calcium voltage-gated channel subunit beta 2  | Involving in the formation of calcium channels                                                                               | AD          |      |      |     |      |      |

|              |                                                   |                                                                                                                                     |         |   |   |   |   |   |
|--------------|---------------------------------------------------|-------------------------------------------------------------------------------------------------------------------------------------|---------|---|---|---|---|---|
| <i>CASQ2</i> | Calsequestrin 2                                   | Involving in the storage and transport of calcium ions through the sarcoplasmic reticulum                                           | AR      |   |   |   |   | X |
| <i>CAV3</i>  | Caveolin 3                                        | Component of the plasma membrane of muscle cells; regulating ion channels; playing role in signal transduction                      | AD, DD  | X | X |   |   |   |
| <i>CRYAB</i> | Crystallin alpha B                                | Acting as a molecular chaperone                                                                                                     | AD, AR  | X | X |   |   |   |
| <i>CSRP3</i> | Cysteine and glycine rich protein 3               | Z-disc structural role; implicating in transcriptional regulation, cytoskeleton organization, cell adhesion and signal transduction | AD      | X | X |   |   |   |
| <i>DES</i>   | Desmin                                            | Structural and mechanical integrity of the contractile apparatus                                                                    | AD, AR  |   | X | X | X |   |
| <i>DMD</i>   | Dystrophin                                        | Part of the dystrophin-glycoprotein complex, which bridges the cytoskeleton and the extracellular matrix                            | XLR, XL |   | X |   |   | X |
| <i>DSC2</i>  | Desmocollin 2                                     | Component of the desmosome, which provides adhesion between cardiac cells                                                           | AD, AR  |   | X |   | X |   |
| <i>DSG2</i>  | Desmoglein 2                                      | Component of the desmosome, which provides adhesion between cardiac cells                                                           | AD      |   | X |   | X |   |
| <i>DSP</i>   | Desmoplakin                                       | Linking the desmosomes to intermediate filaments                                                                                    | AD, AR  |   | X |   | X |   |
| <i>DTNA</i>  | Dystrobrevin alpha                                | Part of the dystrophin-glycoprotein complex, which bridges the cytoskeleton and the extracellular matrix                            | AD      |   |   |   |   | X |
| <i>EMD</i>   | Emerin                                            | Component of the nuclear envelope                                                                                                   | XLR     |   | X |   |   |   |
| <i>EYA4</i>  | EYA transcriptional coactivator and phosphatase 4 | Acting as a transcriptional activator                                                                                               | AD      |   | X |   |   |   |

|              |                                                                         |                                                                                                                                               |        |   |   |   |   |   |
|--------------|-------------------------------------------------------------------------|-----------------------------------------------------------------------------------------------------------------------------------------------|--------|---|---|---|---|---|
| <i>FKTN</i>  | Fukutin                                                                 | Ribitol 5-phosphate transferase in the cis-Golgi compartment involving in the glycosylation of alpha dystroglycan                             | AR     |   | X |   |   |   |
| <i>FLNC</i>  | Filamin C                                                               | Crosslinking actin filaments and anchoring the plasma membrane proteins to the cytoskeleton                                                   | AD     | X |   | X |   |   |
| <i>GLA</i>   | Galactosidase alpha                                                     | Hydrolysing the terminal alpha-galactose groups from glycoproteins and glycolipids in lysosomes                                               | XL     | X |   | X |   | X |
| <i>HCN4</i>  | Hyperpolarization activated cyclic nucleotide gated potassium channel 4 | Transporting ions into cells of the sino-atrial node, which are necessary for the generation of electrical impulses that start each heartbeat | AD     |   |   |   |   |   |
| <i>JPH2</i>  | Junctophilin 2                                                          | Component of the junctional membrane complexes which connect the plasma membrane and the sarcoplasmic reticulum                               | AD     | X |   |   |   |   |
| <i>JUP</i>   | Junction Plakoglobin                                                    | Component of the desmosome, which provides adhesion between cardiac cells                                                                     | AD, AR |   |   |   | X |   |
| <i>KCNE1</i> | Potassium voltage-gated channel subfamily E regulatory subunit 1        | Binding to the potassium channels and regulating their activity                                                                               | AD, AR |   |   |   |   |   |
| <i>KCNE2</i> | Potassium voltage-gated channel subfamily E regulatory subunit 2        | Binding to the potassium channels and regulating their activity                                                                               | AD     |   |   |   |   |   |
| <i>KCNH2</i> | Potassium voltage-gated channel subfamily H member 2                    | Making up potassium channels                                                                                                                  | AD     |   |   |   |   |   |
| <i>KCNJ2</i> | Potassium voltage-gated channel subfamily J member 2                    | Making up potassium channels                                                                                                                  | AD     |   |   |   |   |   |
| <i>KCNQ1</i> | Potassium voltage-gated channel subfamily Q member 1                    | Making up potassium channels                                                                                                                  | AD     |   |   |   |   |   |

|               |                                         |                                                                                                                                                  |            |   |   |   |   |   |
|---------------|-----------------------------------------|--------------------------------------------------------------------------------------------------------------------------------------------------|------------|---|---|---|---|---|
| <i>LAMA4</i>  | Laminin subunit alpha 4                 | The major noncollagenous component of the basement membrane; implicating in cell adhesion, differentiation, migration, signalling and metastasis | AD         |   | X |   |   |   |
| <i>LAMP2</i>  | Lysosomal-associated membrane protein 2 | Involving in the process of the autophagosome maturation in lysosomes                                                                            | XLD        | X | X |   |   |   |
| <i>LDB3</i>   | LIM domain binding 3                    | Providing structural stability to the Z-disc                                                                                                     | AD         | X | X |   |   |   |
| <i>LMNA</i>   | Lamin A/C                               | Component of the nuclear envelope; implicating in cell cycle regulation, chromatin organization and DNA damage response                          | AD, AR     |   | X |   | X | X |
| <i>MYBPC3</i> | Myosin-binding protein C                | Linking the thin and thick filaments of the sarcomeres                                                                                           | AD, AR     | X | X |   |   | X |
| <i>MYH6</i>   | Alpha myosin heavy chain 6              | Component of the cardiac myosin, which makes up the thick filaments of the sarcomeres                                                            | AD         | X | X |   |   |   |
| <i>MYH7</i>   | Beta myosin heavy chain 7               | Major component of the cardiac myosin, which makes up the thick filaments of the sarcomeres                                                      | AD, DD, AR | X | X | X |   | X |
| <i>MYL2</i>   | Myosin regulatory light chain 2         | Essential for the activation of the cardiac myosin during muscle contraction                                                                     | AD         | X |   | X |   |   |
| <i>MYL3</i>   | Myosin essential light chain 3          | Stabilizing the alpha-helical neck of the cardiac myosin head                                                                                    | AD, AR     | X |   | X |   |   |
| <i>MYLK2</i>  | Myosin light chain kinase 2             | Phosphorylating the light chains of myosin, thereby regulating the actin-myosin interaction                                                      | AD, DD     | X |   |   |   |   |
| <i>MYOM1</i>  | Myomesin 1                              | Structural and functional role in the M-band of the sarcomeres                                                                                   | N/A        | X |   |   |   |   |
| <i>MYOZ2</i>  | Myozenin 2                              | Tethering calcineurin to alpha-actinin of the sarcomeres, thus it                                                                                | AD         | X |   |   |   |   |

|               |                                                             |                                                                                                                                                                                                     |        |   |   |   |   |   |
|---------------|-------------------------------------------------------------|-----------------------------------------------------------------------------------------------------------------------------------------------------------------------------------------------------|--------|---|---|---|---|---|
|               |                                                             | is important for calcineurin signaling                                                                                                                                                              |        |   |   |   |   |   |
| <i>MYPN</i>   | Myopalladin                                                 | Part of the alpha-actinin-myopalladin-nebulette complex that tethers titin and actin to the Z-disc of the sarcomeres                                                                                | AD, AR |   | X | X |   |   |
| <i>NEBL</i>   | Nebulette                                                   | Aligning the thin filaments of the sarcomeres and linking them to the Z-disc                                                                                                                        | N/A    |   | X |   |   |   |
| <i>NEXN</i>   | Nexilin                                                     | Involving in Z-disc stability                                                                                                                                                                       | AD     | X | X |   |   |   |
| <i>NKX2.5</i> | NK2 homeobox 5                                              | Homeobox-containing transcription factor, which is important for normal cardiac development                                                                                                         | AD     | X |   |   |   |   |
| <i>PDLIM3</i> | PDZ and LIM domain protein 3                                | Involving in cytoskeletal assembly                                                                                                                                                                  | N/A    |   | X |   |   |   |
| <i>PKP2</i>   | Plakophilin 2                                               | Component of the desmosome, which provides adhesion between cardiac cells                                                                                                                           | AD     |   | X |   | X |   |
| <i>PLN</i>    | Phospholamban                                               | Playing key role in the release and storage of calcium in the sarcoplasmic reticulum                                                                                                                | AD     | X | X |   | X |   |
| <i>PRDM16</i> | PR domain containing 16                                     | Transcription factor, which is important for normal cardiac development                                                                                                                             | AD     |   | X |   |   | X |
| <i>PRKAG2</i> | AMP-activated protein kinase, non-catalytic subunit gamma 2 | Involving in cellular ATP metabolic regulation                                                                                                                                                      | AD     | X |   |   |   |   |
| <i>PTPN11</i> | Protein tyrosine phosphatase SHP2                           | Involving in the regulation of RAS/MAPK signalling pathway, which regulates important cell functions (proliferation, differentiation, migration, apoptosis); critical in normal cardiac development | AD     | X |   |   |   |   |

|               |                                                   |                                                                                                                                                                                                           |         |   |   |  |   |   |
|---------------|---------------------------------------------------|-----------------------------------------------------------------------------------------------------------------------------------------------------------------------------------------------------------|---------|---|---|--|---|---|
| <i>RAF1</i>   | Raf-1 proto-oncogene, serine/threonine kinase     | Part of the RAS/MAPK signalling pathway, which regulates important cell functions (proliferation, differentiation, migration, apoptosis)                                                                  | AD      | X |   |  |   |   |
| <i>RBM20</i>  | RNA-binding motif protein 20                      | Binding RNA and regulating mRNA splicing of genes involved in cardiac development                                                                                                                         | AD      |   | X |  |   |   |
| <i>RYR2</i>   | Ryanodine receptor 2                              | Making up calcium channels, which control the flow of calcium ions through the sarcoplasmic reticulum                                                                                                     | AD      | X |   |  | X |   |
| <i>SCN5A</i>  | Voltage-gated sodium channel subunit alpha Nav1.5 | Making up sodium channels, which control the flow of sodium ions into cardiomyocytes                                                                                                                      | AD, AR  |   | X |  | X |   |
| <i>SGCD</i>   | Sarcoglycan delta                                 | Component of the sarcoglycan complex, which is a member of dystrophin-glycoprotein complex, which bridges the cytoskeleton and the extracellular matrix                                                   | AD?, AR |   | X |  |   |   |
| <i>TAZ</i>    | Tafazzin                                          | Involving in the metabolism of cardiolipin, the main phospholipid of the mitochondrial inner membrane                                                                                                     | XLR     | X | X |  |   | X |
| <i>TCAP</i>   | Titin-cap protein                                 | Involving in sarcomere development and stability                                                                                                                                                          | AD, AR  | X | X |  |   |   |
| <i>TGFB3</i>  | Transforming growth factor beta 3                 | Binding to receptor proteins on the surface of cells and triggering the cell signalling within the cells, which regulates important cell functions (proliferation, differentiation, migration, apoptosis) | AD      |   |   |  | X |   |
| <i>TMEM43</i> | Transmembrane protein 43                          | Involving in the organization of the nuclear membrane                                                                                                                                                     | AD      |   |   |  | X |   |

|              |                   |                                                                                                                                                                                                 |        |   |   |   |   |   |
|--------------|-------------------|-------------------------------------------------------------------------------------------------------------------------------------------------------------------------------------------------|--------|---|---|---|---|---|
| <i>TMPO</i>  | Thymopoietin      | Maintaining the structural organization of the nuclear envelope                                                                                                                                 | N/A    |   | X |   |   |   |
| <i>TNNC1</i> | Troponin C type 1 | Acting as a myofilament calcium sensor; the binding of calcium to troponin C allows the interaction of actin with myosin for the generation of contractile force                                | AD     | X | X |   |   |   |
| <i>TNNI3</i> | Troponin I type 3 | The inhibitory protein of the troponin complex; blocking the actin-myosin interaction in response to the reduction in the intracellular calcium concentration, leading to the muscle relaxation | AD, AR | X | X | X |   |   |
| <i>TNNT2</i> | Troponin T type 2 | The tropomyosin-binding subunit of the troponin complex, which regulates the muscle contraction in response to the changes of the intracellular calcium concentration                           | AD     | X | X | X |   | X |
| <i>TPM1</i>  | Tropomyosin 1     | Maintaining the stability of the thin filament of the sarcomeres; regulating the calcium-dependent actin-myosin interaction                                                                     | AD     | X | X | X |   | X |
| <i>TTN</i>   | Titin             | Maintaining sarcomere structural integrity                                                                                                                                                      | AD, AR | X | X | X | X |   |
| <i>TTR</i>   | Transthyretin     | Involving in the transportation of hormone thyroxine and retinol (vitamin A) throughout the body                                                                                                | AD     | X | X | X |   | X |
| <i>VCL</i>   | Vinculin          | Involving in the anchoring of F-actin to the sarcolemma, thus it is important for cell-cell and cell-extracellular matrix junctions                                                             | AD     | X | X |   |   | X |

AD: Autosomal Dominant, AR: Autosomal Recessive, DD: Digenic Dominant, XL: X-linked, XLD: X-linked Dominant, XLR: X-linked Recessive



**Table S2:** Variants which based on our data were upgraded to Likely Pathogenic and description of the relevant ACMG criteria.

| Family       | Gene-Exon             | Chromosome position; Transcript | Coding   | Protein     | Franklin classification                                                                                   | Cosegregation data                                                                                                                                                  | Our classification |
|--------------|-----------------------|---------------------------------|----------|-------------|-----------------------------------------------------------------------------------------------------------|---------------------------------------------------------------------------------------------------------------------------------------------------------------------|--------------------|
| FAM03 (HOCM) | <i>TNNI3</i> (Exon 7) | chr19:55665519; NM_000363.4     | c.428C>A | p.Thr143Asn | VUS to likely pathogenic (PM1: Pathogenic Moderate, PP2: Pathogenic Supporting, PM2: Pathogenic Moderate) | Proband with HOCM carries the variant, whereas his healthy son does not                                                                                             | Likely pathogenic  |
| FAM10 (HOCM) | <i>PLN</i> (Exon 2)   | chr6:118880229; NM_002667.4     | c.145G>A | p.Val49Met  | VUS to likely pathogenic (PM2: Pathogenic Moderate, PP3: Pathogenic Moderate)                             | Proband with HOCM carries the variant, whereas the healthy family members do not. His mother and his grandmother, who have milder symptoms, carry also the variant. | Likely pathogenic  |
| FAM24 (ARVC) | <i>DSC2</i> (Exon 8)  | chr18:28662978; NM_024422.4     | c.991C>A | p.Gln331Lys | VUS (PM2: Pathogenic Moderate)                                                                            | Proband with ARVC carries the variant as well as his brothers with ARVC. His father, who is healthy, does not carry the variant.                                    | Likely pathogenic  |

CAD: Coronary Artery Disease, HOCM: Hypertrophic Obstructive Cardiomyopathy, ICD: Implantable Cardioverter Defibrillator, ISH: Isolated Septal Hypertrophy

FAM01

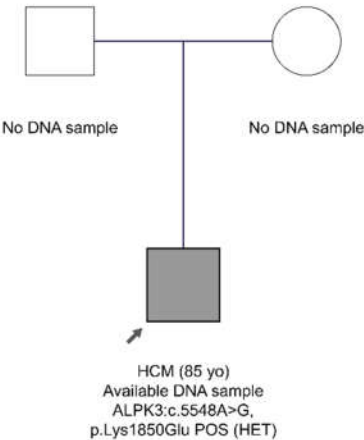

FAM02

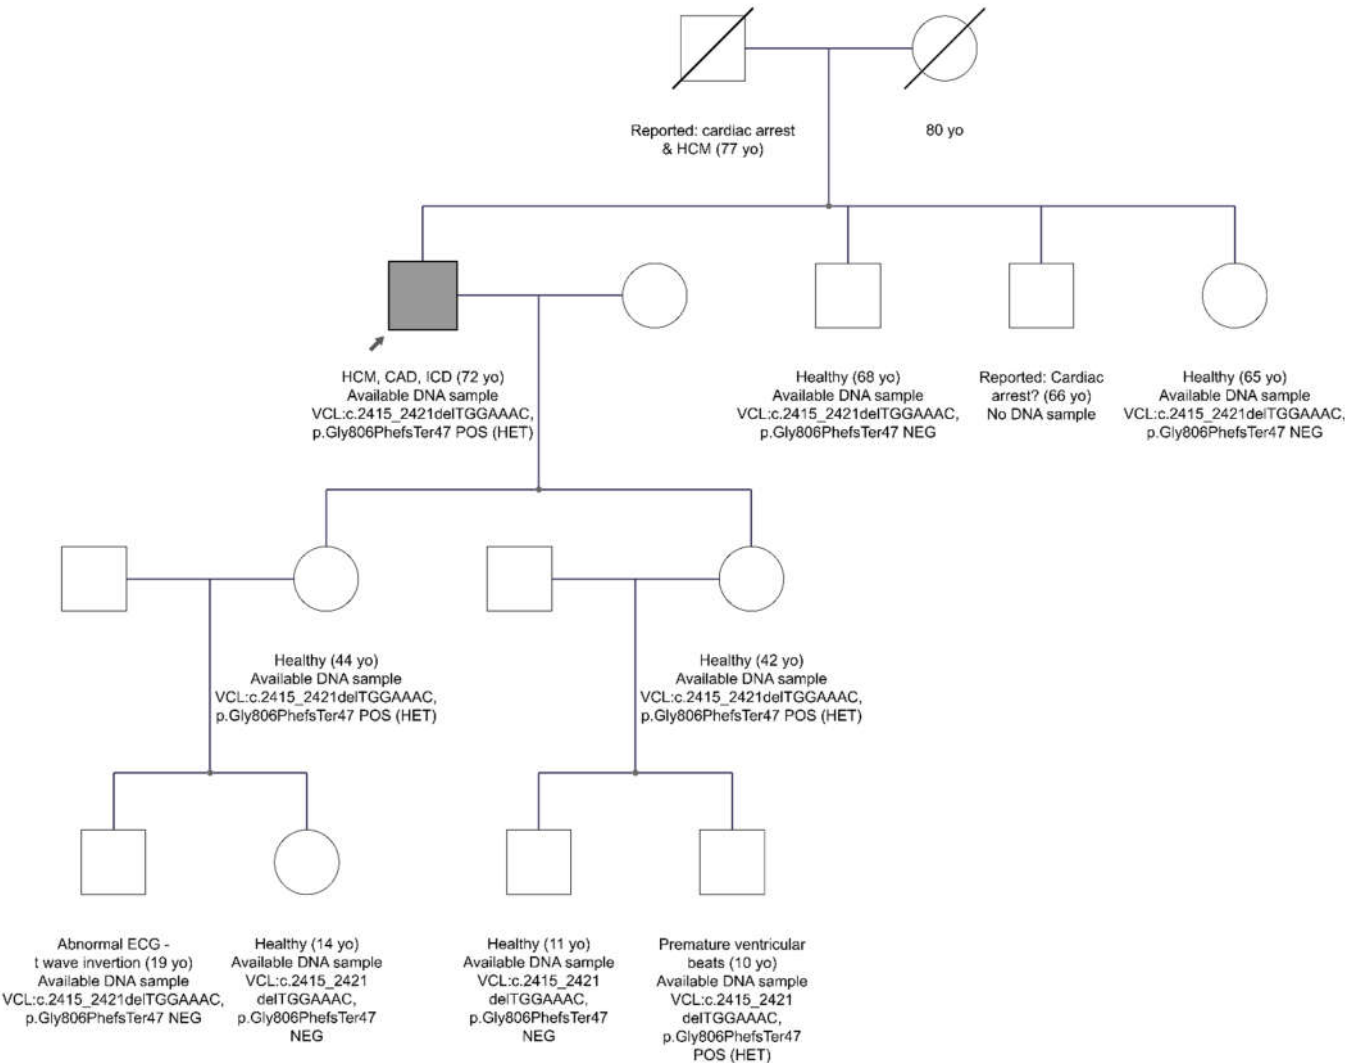

FAM03

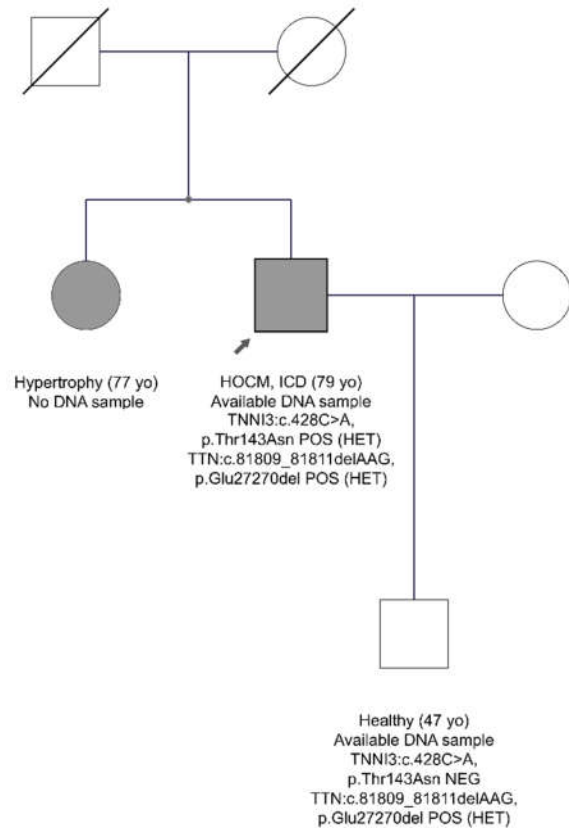

FAM04

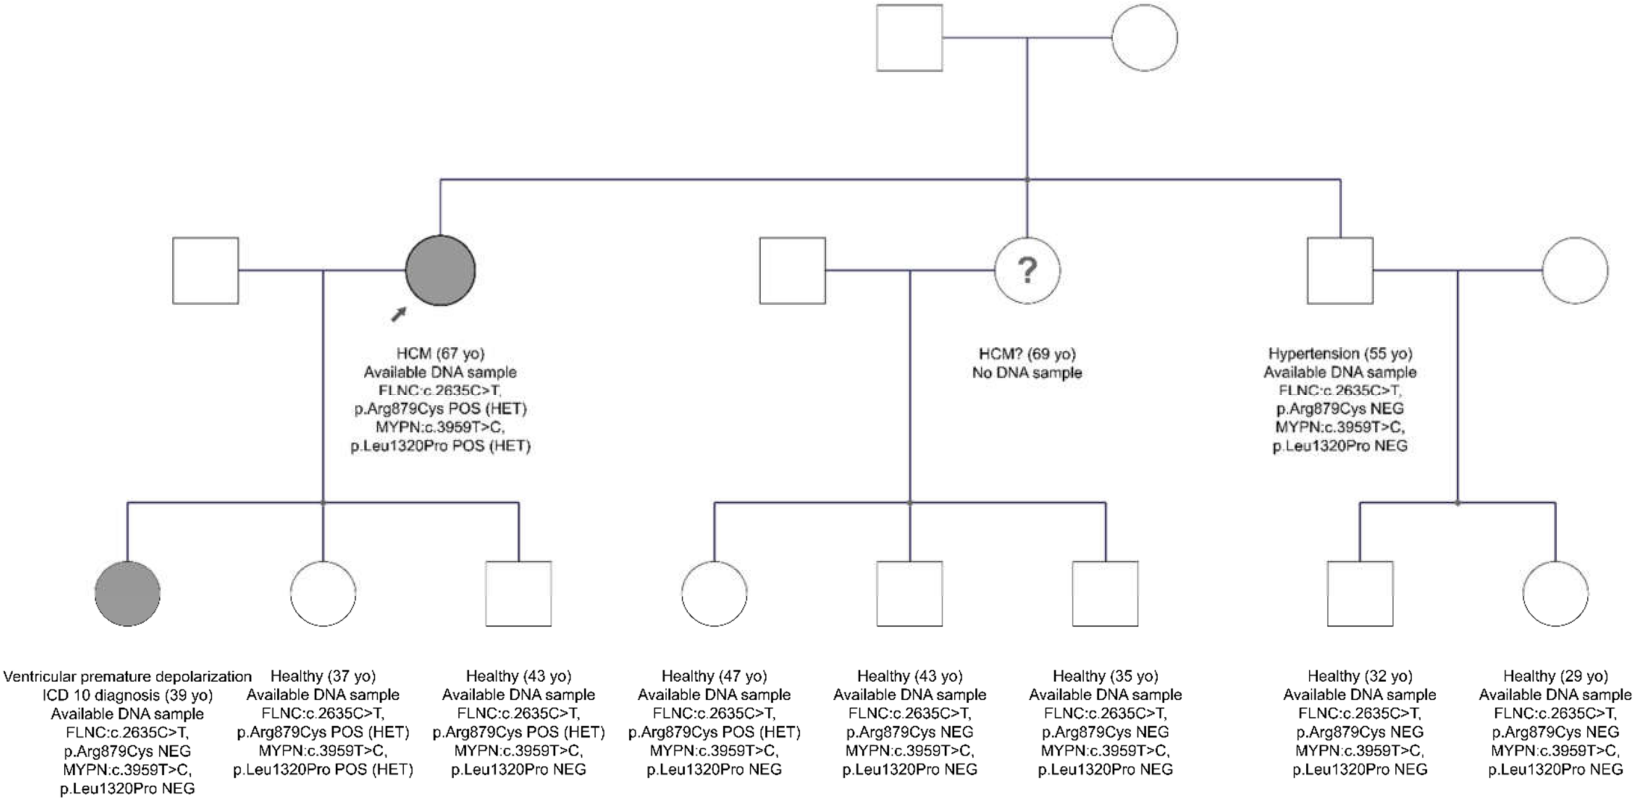

FAM05

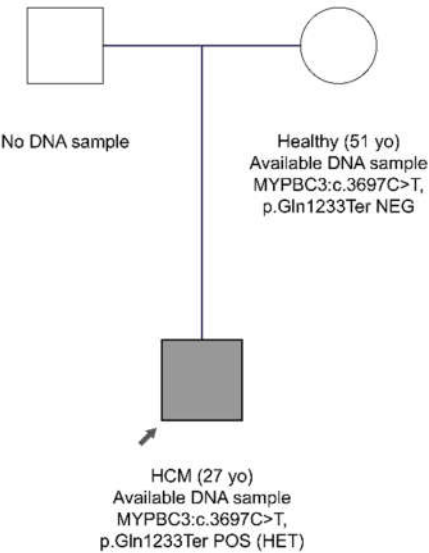

FAM06

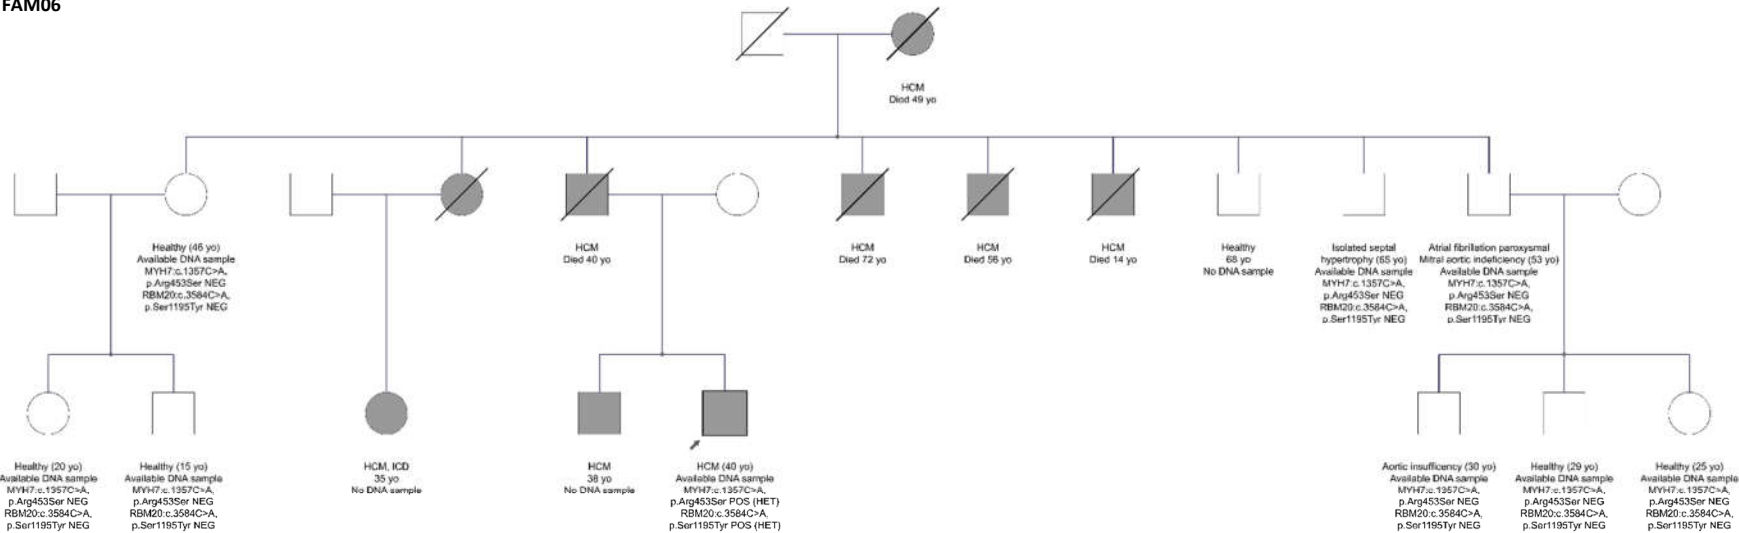

FAM07

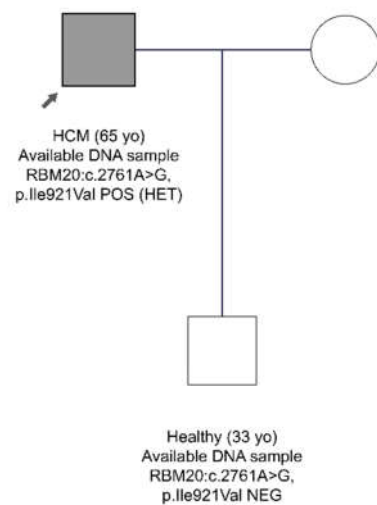

FAM08

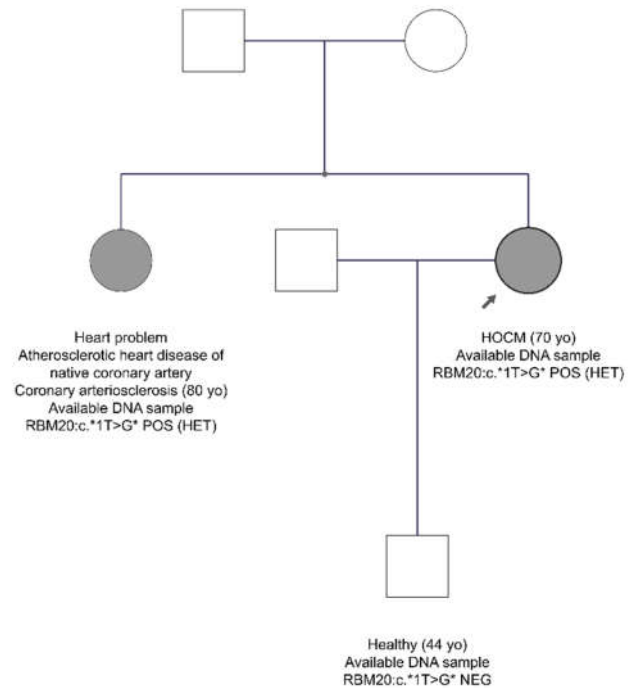

FAM09

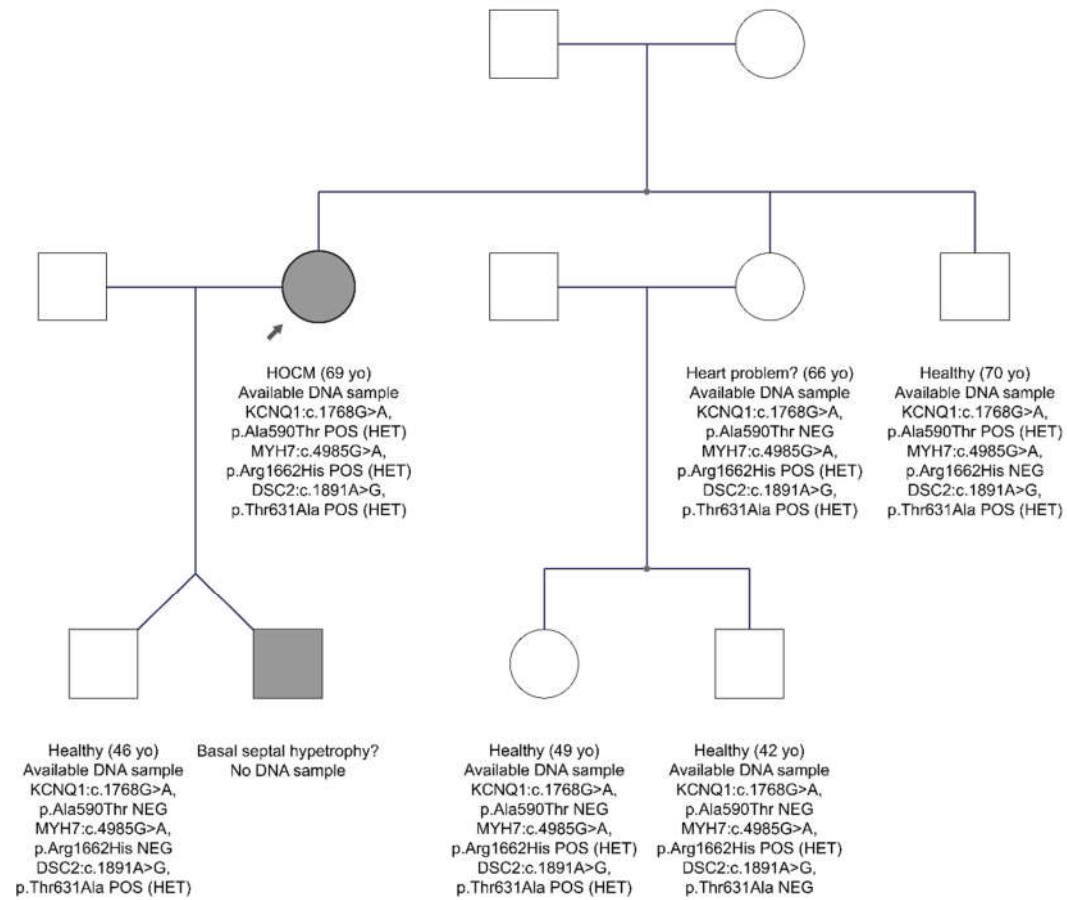

# FAM10

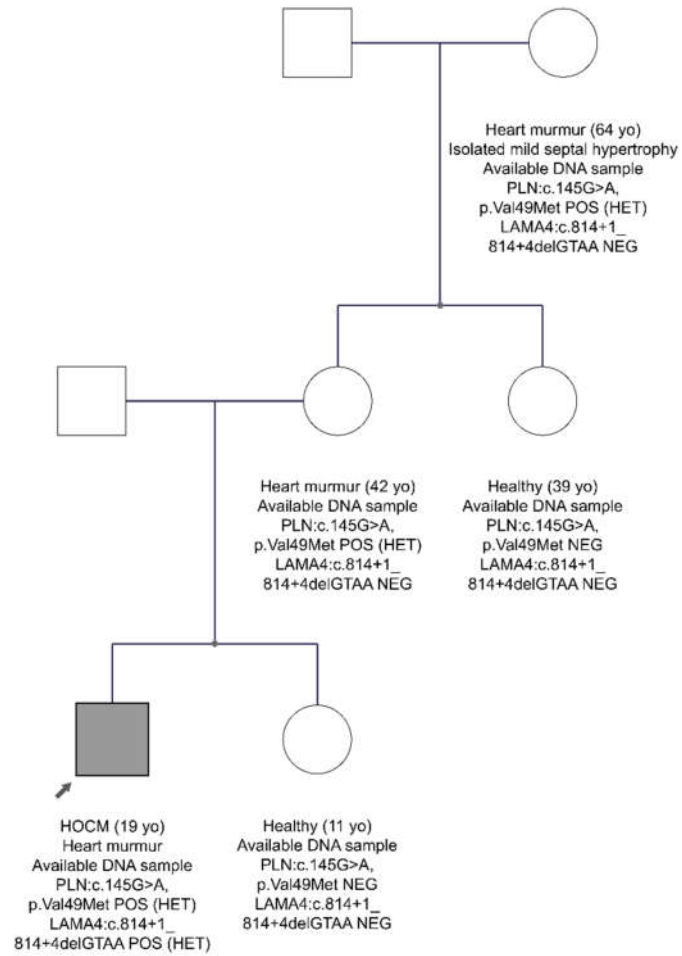

FAM11

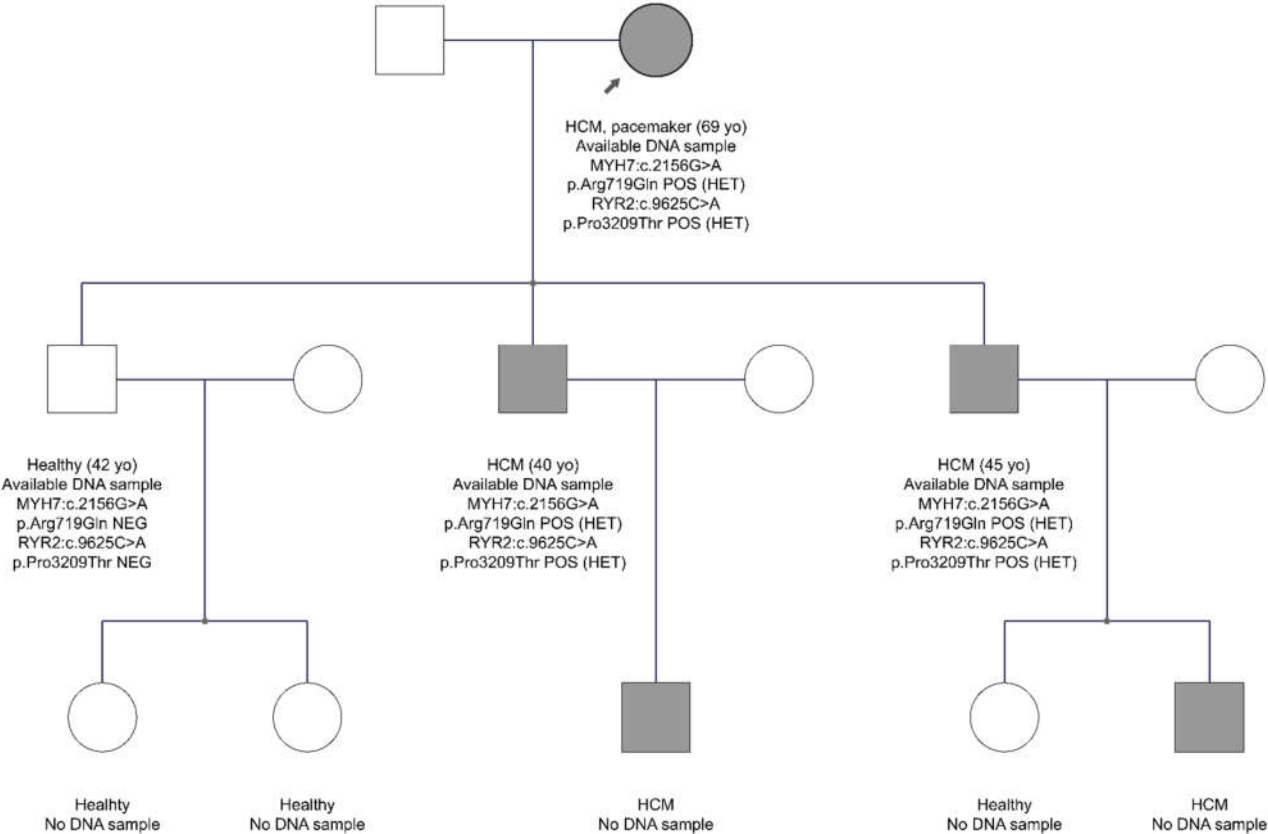

FAM12

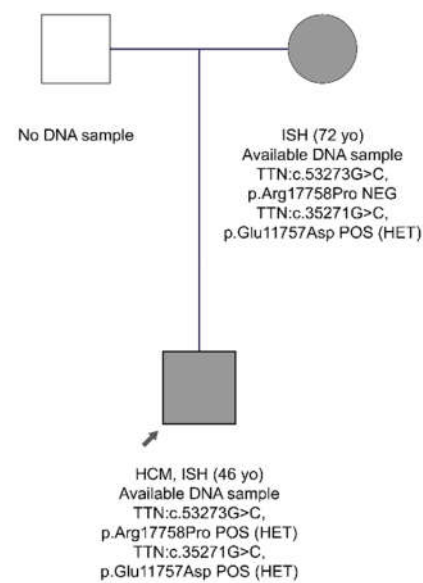

FAM13

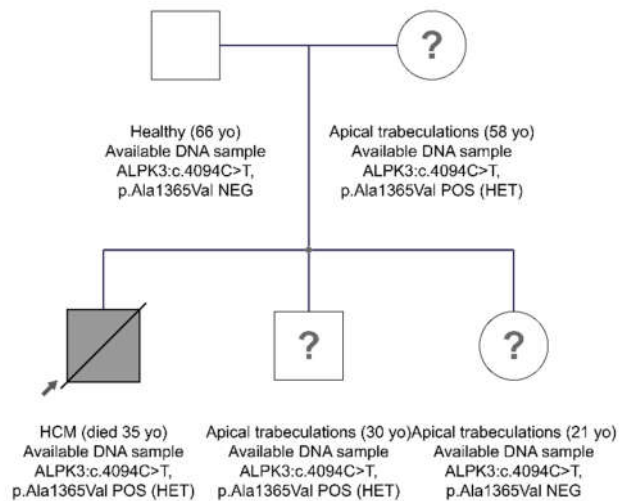

# FAM14

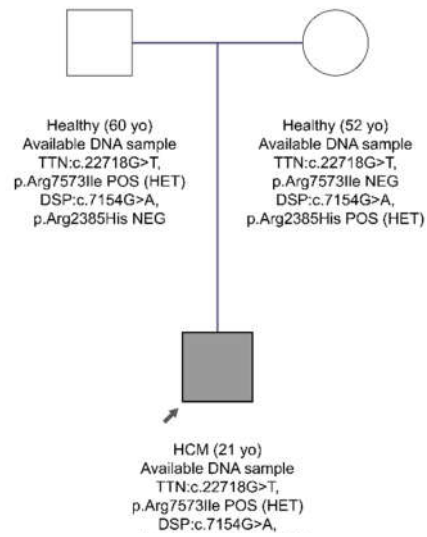

# FAM15

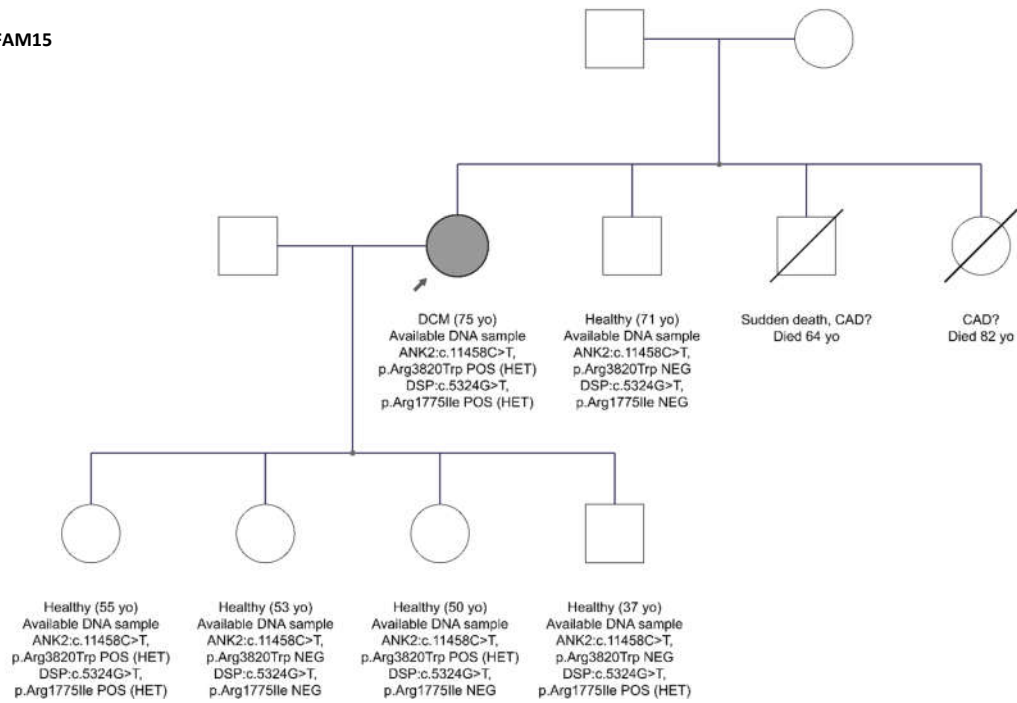

FAM16

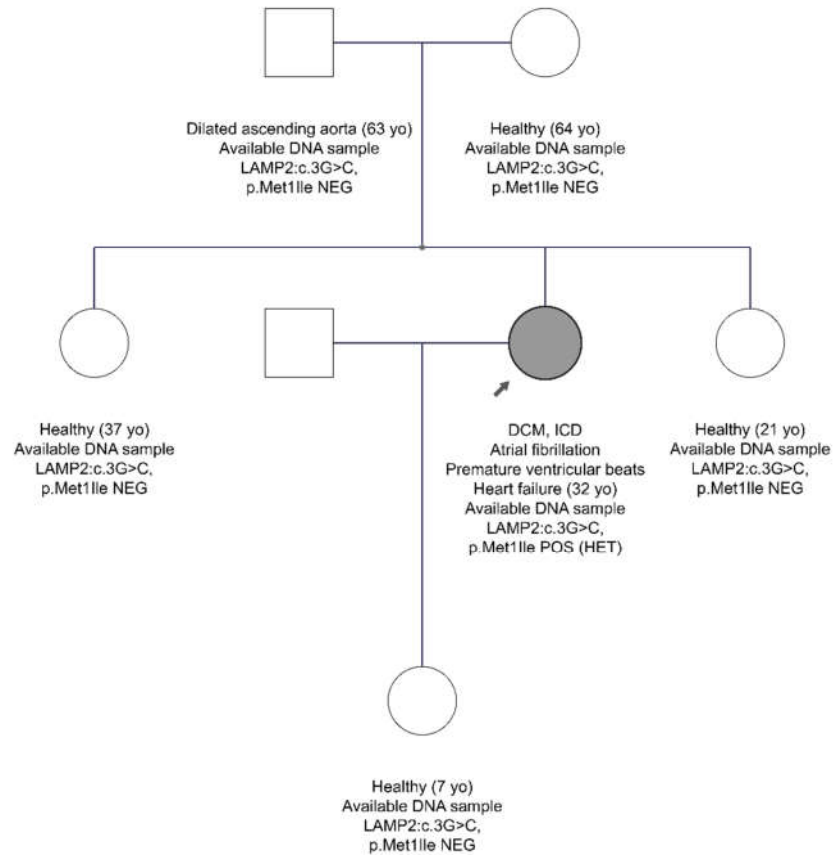

FAM17

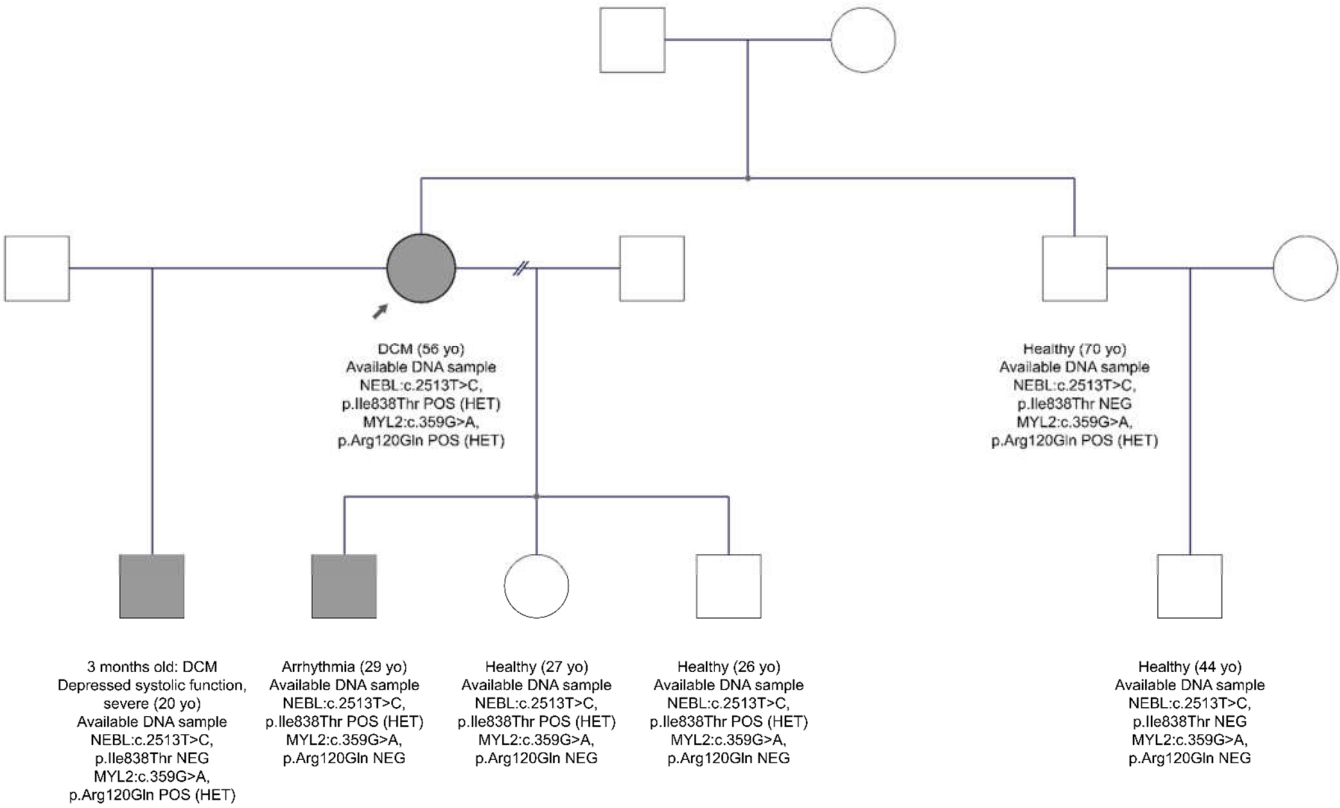

# FAM18

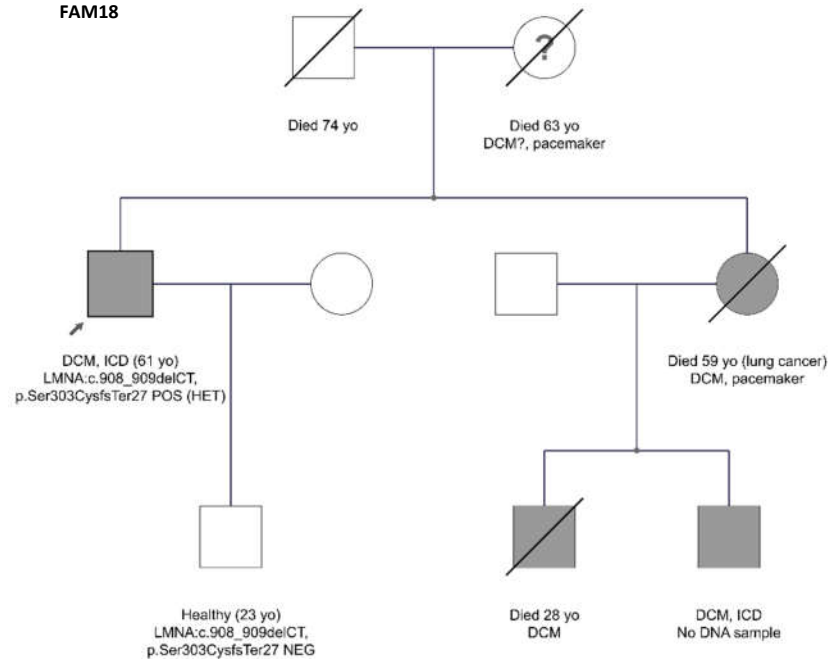

# FAM19

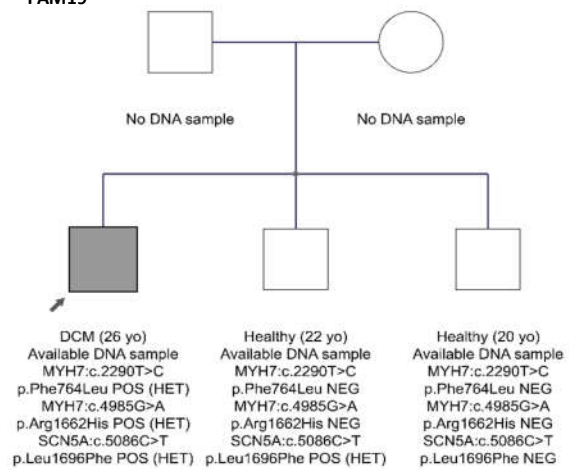

FAM20

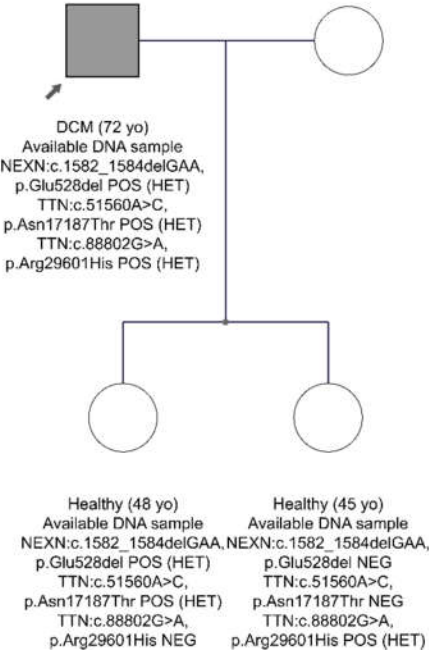

**FAM21**

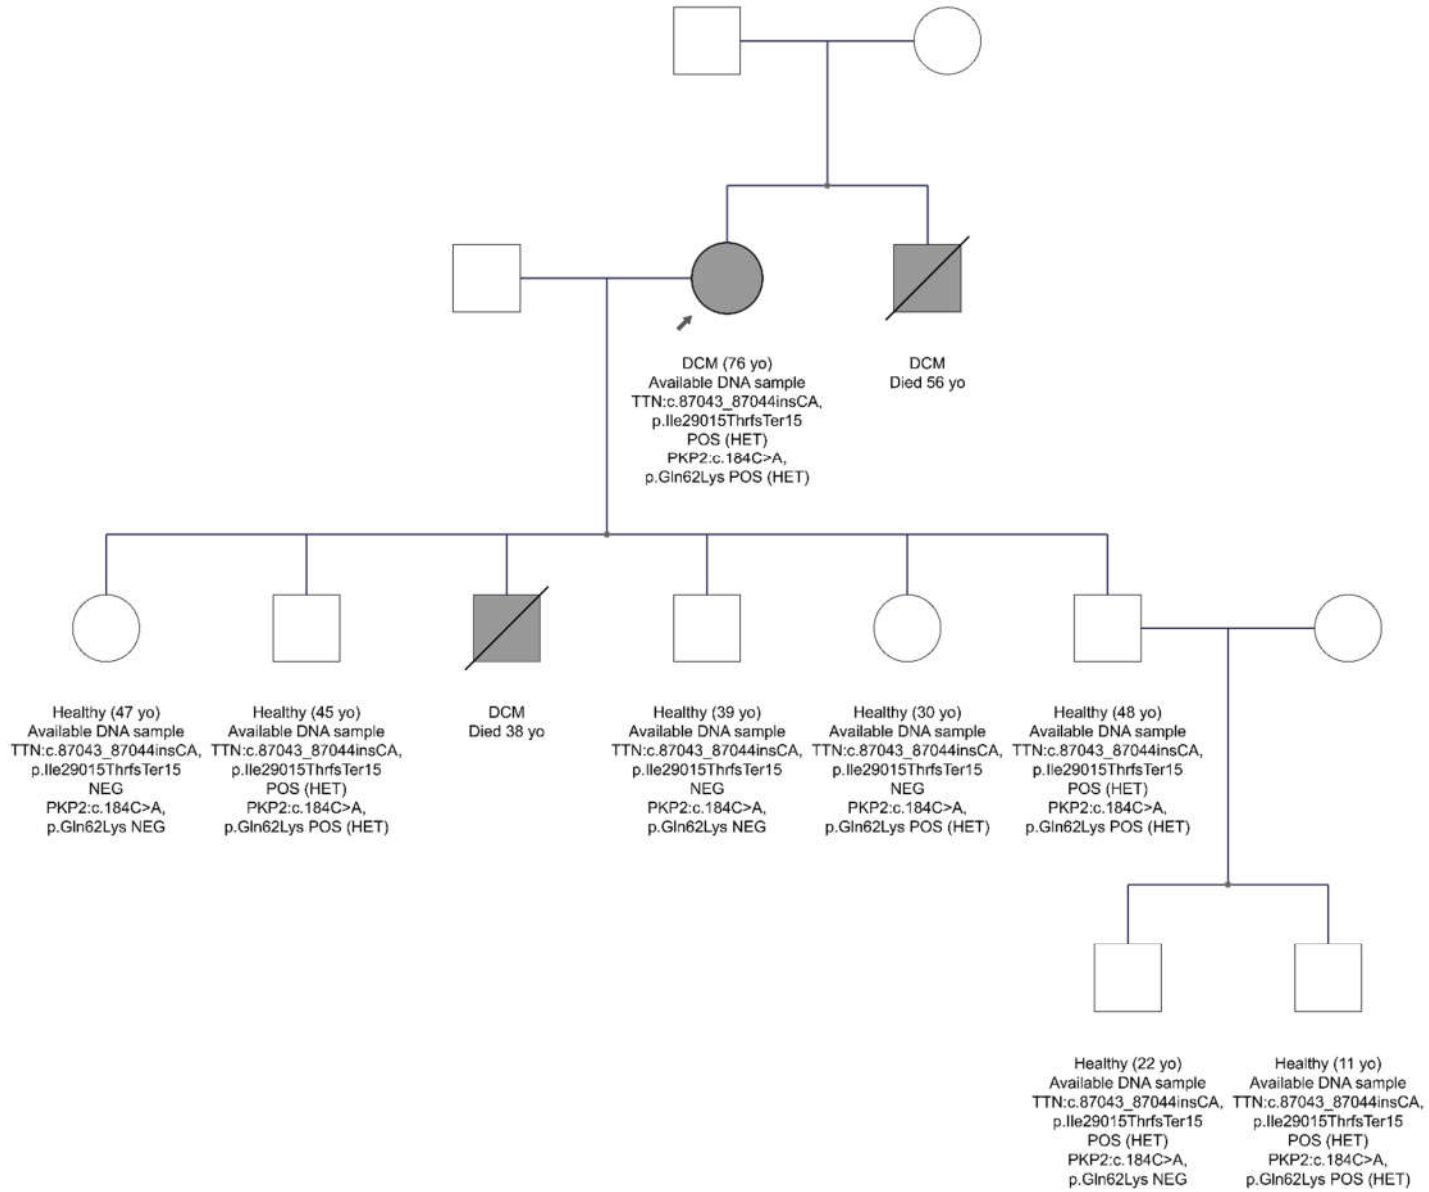

FAM22

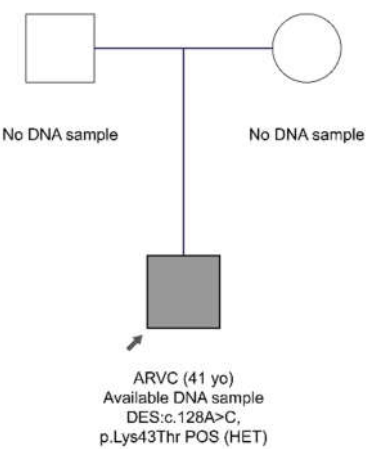

FAM23

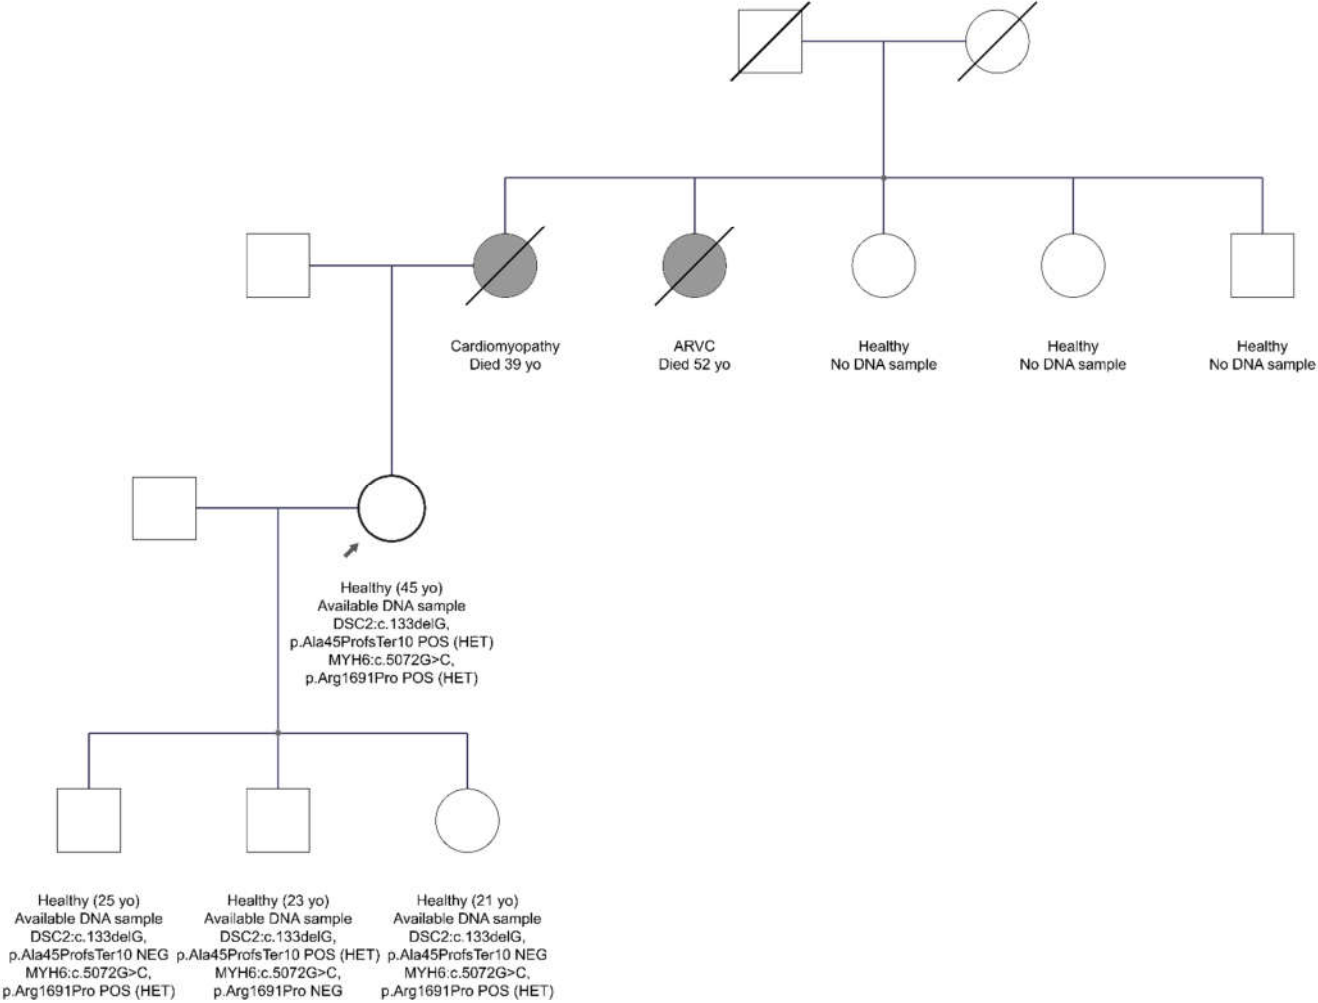

## FAM2

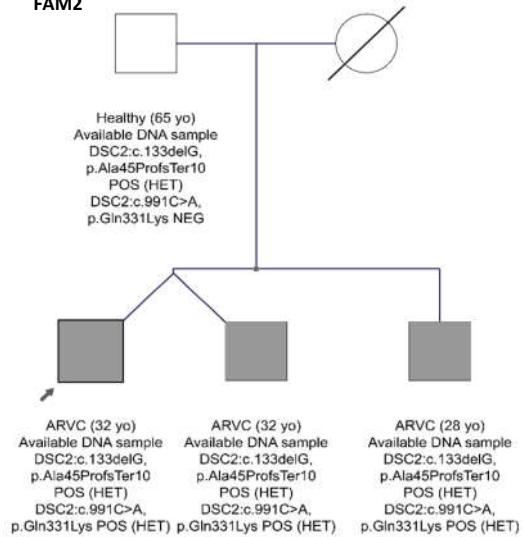

## FAM25

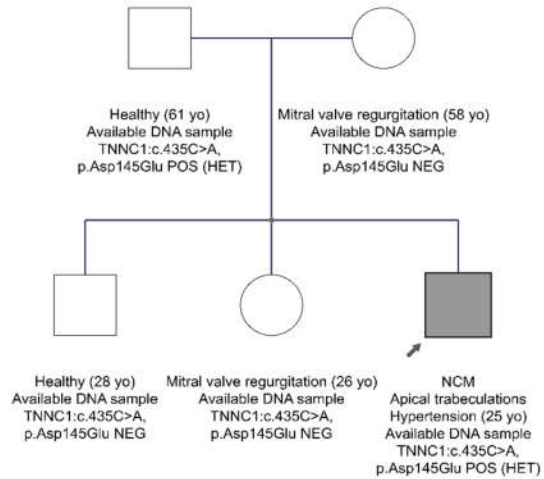

**Figure S1:** Pedigrees of FAM01-25 described in the paper. The proband is indicated by the black arrow. Information provided below each subject is the clinical data, age, the gene and variant(s) found.
